# Supplementary material for: Quantitative analysis of multiple high-resolution mass spectrometry images using chemometric methods: quantitation of chlordecone in mouse liver
Source: Royal Society of Chemistry journal article supplement (doi:10.1039/c7an02059g), 2018-01-01
Supplement: c7an02059g1.pdf [file c7an02059g1.pdf]

## Supporting Information

### **Quantitative analysis of multiple high-resolution mass spectrometry images using chemometric methods: Quantitation of chlordecone in mouse liver**

Saeedeh Mohammadi, Hadi Parastar\*

*Department of Chemistry, Sharif University of Technology, P.O. Box 11155-3516, Tehran, Iran*

\* Author to whom correspondence should be addressed;

Tel.: +98- 21- 66165306; fax: +98- 21- 66029165 (Hadi Parastar)

E-mail: [h.parastar@sharif.edu](mailto:h.parastar@sharif.edu), [h.parastar@gmail.com](mailto:h.parastar@gmail.com)

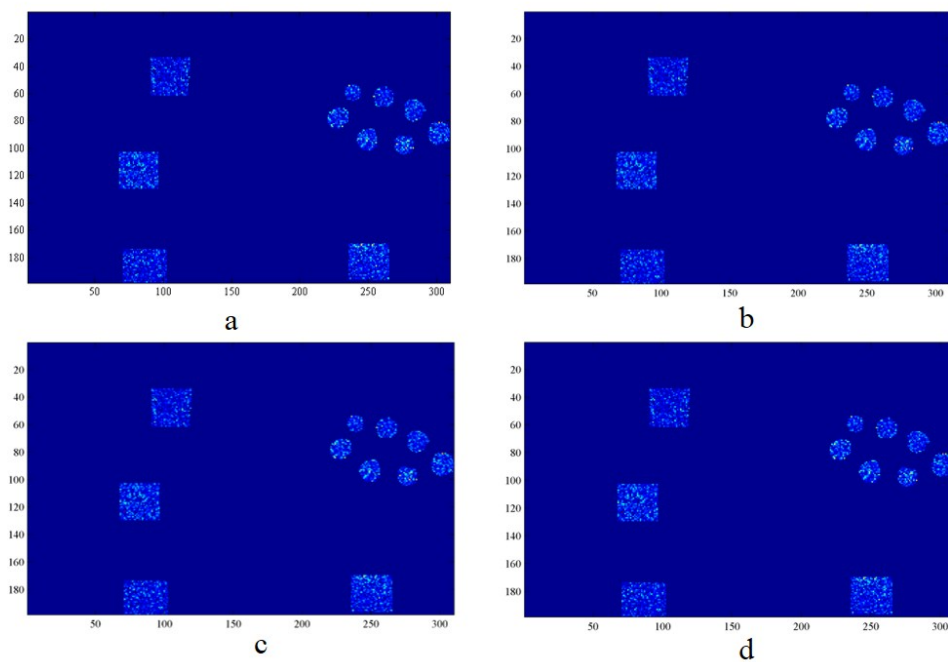

**Figure S1.** 2D image of (a) original data set II and binned data in (b) bin size 0.25 (c) bin size 0.5 (d) bin size 1

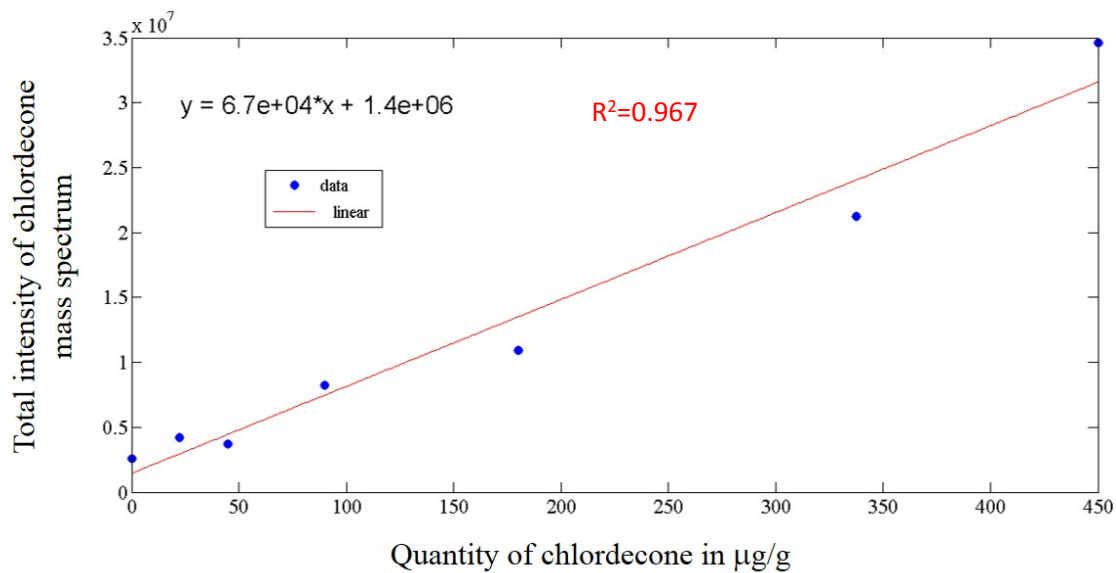

**Figure S2.** Calibration curve for data set II with bin size 0.25.

**Table S1.** Univariate analytical figures of merit for quantification of chlordecone using MALDI-MSI associated with MCR-ALS method.

| Bin size<br>Time<br>(day) | Slope               |                     |                     | Intercept           |                     |                     | LOF  |     |      | RE (%) <sup>a</sup> |      |      |
|---------------------------|---------------------|---------------------|---------------------|---------------------|---------------------|---------------------|------|-----|------|---------------------|------|------|
|                           | 0.25                | 0.5                 | 1                   | 0.25                | 0.5                 | 1                   | 0.25 | 0.5 | 1    | 0.25                | 0.5  | 1    |
| 1                         | 2.6×10 <sup>4</sup> | 2.1×10 <sup>4</sup> | 1.6×10 <sup>4</sup> | 5.9×10 <sup>6</sup> | 1.2×10 <sup>6</sup> | 4.2×10 <sup>5</sup> | 4.1  | 5.3 | 10.7 | 10.3                | 11.2 | 8.37 |
| 5                         | 6.7×10 <sup>4</sup> | 2.5×10 <sup>4</sup> | 4.2×10 <sup>5</sup> | 2.8×10 <sup>5</sup> | 4.7×10 <sup>6</sup> | 1.2×10 <sup>6</sup> | 7.0  | 7.5 | 11.7 | 6.5                 | 8.2  | 11.2 |
| 10                        | 7.0×10 <sup>4</sup> | 4.2×10 <sup>4</sup> | 3.0×10 <sup>4</sup> | 1.3×10 <sup>6</sup> | 2.8×10 <sup>5</sup> | 4.8×10 <sup>6</sup> | 7.0  | 8.3 | 8.4  | 3.8                 | 6.5  | 6.99 |

$${}^a \text{RE}(\%) = 100 \sqrt{\frac{\sum_i (c_i - \hat{c}_i)^2}{\sum_i (c_i)^2}}$$
